# Supplementary material for: Synthesis and Investigation of TiO2/g-C3N4 Performance for Photocatalytic Degradation of Bromophenol Blue and Eriochrome Black T: Experimental Design Optimization and Reactive Oxygen Species Contribution
Source: MDPI journal article supplement (doi:10.3390/w14203331), 2022-10-21
Supplement: s1 [file s1]

# Synthesis and Investigation of $\text{TiO}_2/\text{g-C}_3\text{N}_4$ Performance for Photocatalytic Degradation of Bromophenol Blue and Eriochrome Black T: Experimental Design Optimization and Reactive Oxygen Species Contribution

Fadimatou Hassan <sup>1,2</sup>, Pierre Bonnet <sup>3</sup>, Jean Marie Dangwang Dikdim <sup>2</sup>, Nadege Gatcha Bandjoun <sup>2</sup>,  
Christophe Caperaa <sup>3</sup>, Sadou Dalhatou <sup>2</sup>, Abdoulaye Kane <sup>1,\*</sup> and Hicham Zeghioud <sup>1,\*</sup>

<sup>1</sup> UniLaSalle-Ecole des Métiers de l'Environnement, Cyclann, Campus de Ker Lann, 35170 Bruz, France

<sup>2</sup> Department of Chemistry, Faculty of Science, University of Maroua, 814 Maroua, Cameroon

<sup>3</sup> Institut de Chimie de Clermont-Ferrand (ICCF), Université Clermont Auvergne, 24 Avenue Blaise Pascal, 63178 Aubiere, France

\* Correspondence: hicham.zeghioud@unilasalle.fr (H.Z.); abdoulaye.kane@unilasalle.fr (A.K.)

The spectrum of used lamp in the photocatalytic experiments from 300 to 800 nm is shown in Figure S1 below:

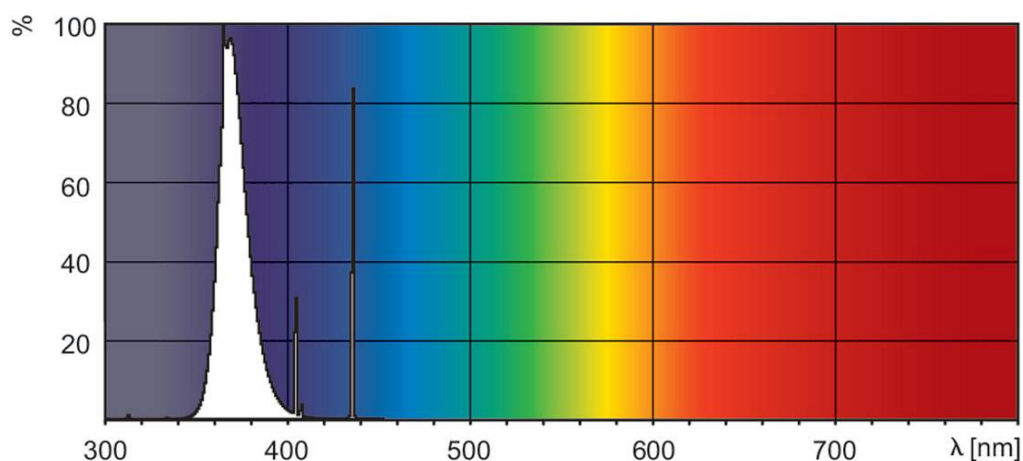

Figure S1. UV lamp spectrum (24 W).

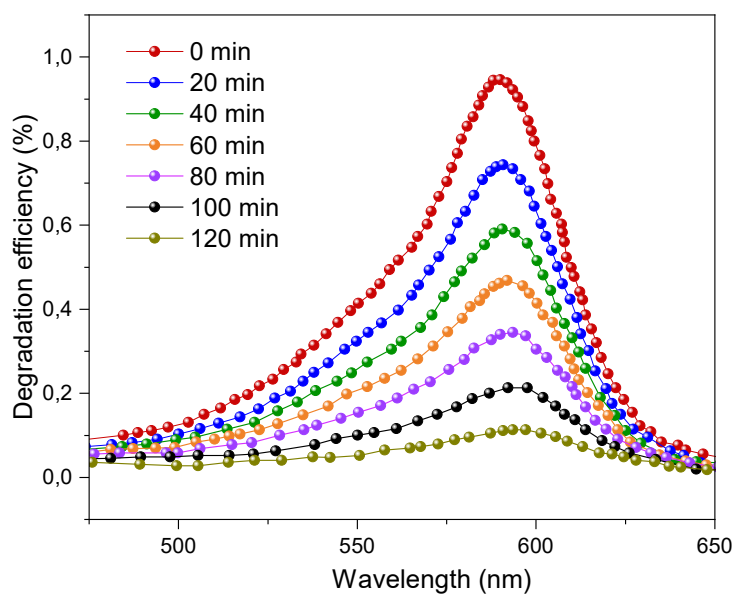

**Figure S2.** Photocatalytic degradation of BPB with  $\text{TiO}_2/\text{g-C}_3\text{N}_4$  under uv light ( $C_0$ : 10ppm, Catalyst dose: 200 mg/L, V solution: 500 ml, natural pH)
